# Supplementary material
Source: Springer Nature journal article supplement (https://lshtm-eprints-repo-prod.lshtm-eprints.cdl.cosector.com/2031026/1/12889_2013_7365_MOESM1_ESM.pdf)
Supplement: MOESM1 [file 12889_2013_7365_MOESM1_ESM.pdf]

## Analysis without imputation

**Table 2a** Summary characteristics of key indicators: drought exposure, food insecurity, and psychological distress, stratified by rural and urban location

|                                          | Rural<br>(N=919) <sup>a</sup> |     | Urban<br>(N=4093) <sup>a</sup> |      | All<br>(N=5012) |      | Mean difference<br>between rural and<br>urban |     |         |
|------------------------------------------|-------------------------------|-----|--------------------------------|------|-----------------|------|-----------------------------------------------|-----|---------|
|                                          | %                             | N   | %                              | N    | %               | N    | %                                             | SE  | P-value |
| <b>Drought exposure</b>                  |                               |     |                                |      |                 |      |                                               |     |         |
| Zero and Moderate                        | 65.0                          | 597 | 44.3                           | 1814 | 47.3            | 2369 | 20.6                                          | 6.9 | 0.003   |
| Very Dry                                 | 5.5                           | 50  | 13.4                           | 550  | 12.3            | 616  | -8.0                                          | 3.4 | 0.019   |
| Long Dry                                 | 18.1                          | 166 | 32.1                           | 1314 | 30.1            | 1509 | -14.0                                         | 6.0 | 0.019   |
| Constant Dry                             | 5.8                           | 54  | 3.0                            | 123  | 3.4             | 171  | 2.8                                           | 2.5 | 0.259   |
| Constant and Long Dry                    | 5.6                           | 52  | 7.2                            | 293  | 6.9             | 348  | 1.5                                           | 3.7 | 0.681   |
| <b>Food insecurity<sup>a</sup></b>       |                               |     |                                |      |                 |      |                                               |     |         |
| <i>Missing meals</i>                     |                               |     |                                |      |                 |      |                                               |     |         |
| Yes                                      | 1.8                           | 16  | 1.5                            | 60   | 1.6             | 78   | 0.2                                           | 0.7 | 0.663   |
| No                                       | 98.2                          | 882 | 98.4                           | 3941 | 98.4            | 4821 |                                               |     |         |
| <i>Core food consumption</i>             |                               |     |                                |      |                 |      |                                               |     |         |
| Below-average                            | 33.1                          | 292 | 31.4                           | 1234 | 31.7            | 1526 | 1.7                                           | 2.4 | 0.635   |
| Above-average                            | 66.9                          | 591 | 68.6                           | 2696 | 68.3            | 3287 |                                               |     |         |
| <i>Discretionary food consumption</i>    |                               |     |                                |      |                 |      |                                               |     |         |
| Above average                            | 60.0                          | 540 | 62.4                           | 2470 | 62.1            | 3017 | -2.0                                          | 2.7 | 0.466   |
| Below average                            | 40.0                          | 360 | 37.6                           | 1489 | 37.9            | 1842 |                                               |     |         |
| <b>Psychological distress, Mean (SE)</b> |                               |     |                                |      |                 |      |                                               |     |         |
|                                          | 15.1                          | 0.3 | 15.6                           | 0.1  | 15.5            | 0.1  | -0.5                                          | 0.3 | 0.104   |

Note: <sup>a</sup> Because of missing values, the sample sizes for food insecurity are variable

**Table 4a** Mean levels of psychological distress by measures of food insecurity, adjusted for confounding variables

| <b>Food insecurity</b>                       |     | <b>Mean Score (SE)</b> | <b>Mean score difference (SE)</b> | <b>P-value</b> |
|----------------------------------------------|-----|------------------------|-----------------------------------|----------------|
| Missing meals                                | Yes | 23.2 (0.6)             | 8.3 (0.6)                         | <0.001         |
|                                              | No  | 14.9 (0.1)             |                                   |                |
| Below-average consumption core food          | Yes | 15.5 (0.1)             | 0.5 (0.2)                         | 0.004          |
|                                              | No  | 15.0 (0.1)             |                                   |                |
| Above-average consumption discretionary food | Yes | 15.3 (0.1)             | 0.5 (0.2)                         | 0.001          |
|                                              | No  | 14.7 (0.1)             |                                   |                |

Note: Results for this analysis are presented for the whole sample only as the rural-urban interaction was not significant

**Table 5a** Levels of food insecurity by type of drought exposure, stratified by urban and rural location, adjusted for confounding variables

|                                 | Food insecurity  |                                   |                  |                                     |                                   |         |                                              |                                   |         |
|---------------------------------|------------------|-----------------------------------|------------------|-------------------------------------|-----------------------------------|---------|----------------------------------------------|-----------------------------------|---------|
|                                 | Missing meals    |                                   |                  | Below-average consumption core food |                                   |         | Above-average consumption discretionary food |                                   |         |
|                                 | Mean % (SE)      | Mean difference (SE) <sup>1</sup> | P-value          | Mean % (SE)                         | Mean difference (SE) <sup>1</sup> | P-value | Mean % (SE)                                  | Mean difference (SE) <sup>1</sup> | P-value |
| <b>Drought exposure (Rural)</b> |                  |                                   |                  |                                     |                                   |         |                                              |                                   |         |
| Zero or Moderate                | 1.6 (0.5)        | -0.1 (1.5)                        | 0.934            | 33.2 (2.4)                          | -10.7 (7.5)                       | 0.154   | 58.6 (3.0)                                   | -0.5 (5.8)                        | 0.927   |
| Very Dry                        | n.a <sup>2</sup> | n.a <sup>2</sup>                  | n.a <sup>2</sup> | 26.1 (3.3)                          | -17.8 (7.8)                       | 0.024   | 70.4 (5.0)                                   | 11.3 (7.3)                        | 0.121   |
| Long Dry                        | 2.3 (0.7)        | 0.6 (1.9)                         | 0.744            | 31.0 (3.2)                          | -12.9 (7.6)                       | 0.090   | 62.5 (4.1)                                   | 3.4 (6.4)                         | 0.595   |
| Constant Dry                    | 3.9 (2.8)        | 2.2 (3.3)                         | 0.511            | 27.5 (7.6)                          | -16.4 (10.1)                      | 0.106   | 64.1 (7.4)                                   | 5.0 (8.9)                         | 0.577   |
| Constant and Long Dry           | 1.7 (1.6)        | -                                 | -                | 43.9 (7.1)                          | -                                 | -       | 59.1 (5.0)                                   | -                                 | -       |
| <b>Drought exposure (Urban)</b> |                  |                                   |                  |                                     |                                   |         |                                              |                                   |         |
| Zero or Moderate                | 1.9 (0.5)        | 1.2 (0.8)                         | 0.133            | 33.4 (1.9)                          | -0.8 (4.5)                        | 0.857   | 64.7 (1.3)                                   | 4.3 (4.7)                         | 0.366   |
| Very Dry                        | 0.9 (0.8)        | 0.1 (0.7)                         | 0.925            | 29.4 (2.2)                          | -4.8 (4.7)                        | 0.307   | 62.7 (2.7)                                   | 2.3 (5.4)                         | 0.673   |
| Long Dry                        | 1.3 (0.4)        | 0.5 (0.7)                         | 0.510            | 28.4 (1.7)                          | -5.8 (4.5)                        | 0.191   | 59.4 (1.5)                                   | -1.1 (4.8)                        | 0.827   |
| Constant Dry                    | 4.7 (2.0)        | 3.9 (2.1)                         | 0.062            | 41.5 (5.2)                          | 7.3 (6.6)                         | 0.272   | 56.5 (2.7)                                   | -4.0 (5.3)                        | 0.455   |
| Constant and Long Dry           | 0.8 (0.6)        | -                                 | -                | 34.3 (4.1)                          | -                                 | -       | 60.4 (4.6)                                   | -                                 | -       |

<sup>1</sup>The mean score difference measures the difference in the estimated mean psychological distress score between ‘constant and long dry’ and each other drought category

<sup>2</sup>The ‘very dry’ drought category is dropped in the regression of missing meals because this variable perfectly predict the failure (missing meals = 0), causing this variable’s coefficient to be unidentified.

**Table 6a** Levels of psychological distress by type of drought exposure, stratified by rural and urban location, adjusted for confounding variables

| Drought exposure      | Psychological distress |                                         |         |                 |                                         |         |
|-----------------------|------------------------|-----------------------------------------|---------|-----------------|-----------------------------------------|---------|
|                       | Rural                  |                                         |         | Urban           |                                         |         |
|                       | Mean score (SE)        | Mean score difference <sup>1</sup> (SE) | P-value | Mean score (SE) | Mean score difference <sup>1</sup> (SE) | P-value |
| Zero or Moderate      | 14.8 (0.2)             | -3.4 (1.1)                              | 0.002   | 15.3 (0.1)      | 0.6 (0.4)                               | 0.079   |
| Very Dry              | 14.9 (0.7)             | -3.3 (1.3)                              | 0.009   | 15.1 (0.3)      | 0.4 (0.4)                               | 0.390   |
| Long Dry              | 14.8 (0.5)             | -3.4 (1.1)                              | 0.003   | 15.0 (0.2)      | 0.3 (0.4)                               | 0.481   |
| Constant Dry          | 15.5 (0.7)             | -2.7 (1.3)                              | 0.034   | 14.9 (0.5)      | 0.2 (0.6)                               | 0.784   |
| Constant and Long Dry | 18.8 (1.0)             | -                                       | -       | 14.7 (0.3)      | -                                       | -       |

<sup>1</sup>The mean score difference measures the difference in the estimated mean psychological distress score between 'constant and long dry' and each other drought category

**Table 7a** Mean psychological distress scores in different measures of food insecurity, according to level of drought exposure

| Food insecurity indicator                           | Drought exposures |         |            |         |            |         |              |         |                       |         |
|-----------------------------------------------------|-------------------|---------|------------|---------|------------|---------|--------------|---------|-----------------------|---------|
|                                                     | Zero or Moderate  |         | Very Dry   |         | Long Dry   |         | Constant Dry |         | Constant and Long Dry |         |
|                                                     | Mean (SE)         | P-value | Mean (SE)  | P-value | Mean (SE)  | P-value | Mean (SE)    | P-value | Mean (SE)             | P-value |
| <b>Missing meals</b>                                |                   |         |            |         |            |         |              |         |                       |         |
| Yes                                                 | 22.3 (0.8)        |         | 31.9 (2.3) |         | 24.3 (1.2) |         | 19.7 (2.0)   |         | 18.4 (3.7)            |         |
| No                                                  | 15.0 (0.1)        |         | 14.9 (0.2) |         | 14.8 (0.2) |         | 14.5 (0.4)   |         | 14.9 (0.3)            |         |
| Yes/No difference                                   | 7.3 (0.8)         | <0.001  | 17.0 (2.3) | <0.001  | 9.5 (1.2)  | <0.001  | 5.2 (2.0)    | 0.009   | 7.2 (3.7)             | 0.053   |
| <b>Below-average consumption core food</b>          |                   |         |            |         |            |         |              |         |                       |         |
| Yes                                                 | 15.5 (0.2)        |         | 15.5 (0.4) |         | 15.5 (0.3) |         | 14.9 (0.6)   |         | 15.1 (0.5)            |         |
| No                                                  | 15.1 (0.1)        |         | 15.0 (0.3) |         | 14.8 (0.2) |         | 14.9 (0.5)   |         | 14.7 (0.4)            |         |
| Yes/No difference                                   | 0.5 (0.2)         | 0.062   | 0.5 (0.5)  | 0.356   | 0.7 (0.3)  | 0.030   | -0.0 (0.7)   | 0.959   | 0.4 (0.6)             | 0.570   |
| <b>Above-average consumption discretionary food</b> |                   |         |            |         |            |         |              |         |                       |         |
| Yes                                                 | 15.4 (0.2)        |         | 15.4 (0.3) |         | 15.1 (0.2) |         | 14.6 (0.5)   |         | 15.5 (0.4)            |         |
| No                                                  | 14.9 (0.2)        |         | 14.6 (0.4) |         | 14.7 (0.2) |         | 15.0 (0.6)   |         | 14.0 (0.5)            |         |
| Yes/No difference                                   | 0.5 (0.2)         | 0.037   | 0.8 (0.5)  | 0.072   | 0.4 (0.3)  | 0.145   | -0.5 (0.7)   | 0.525   | 1.5 (0.6)             | 0.014   |

Note: Results are presented for the whole sample only as the rural-urban interaction was not significant in this analysis. All analyses are adjusted for confounding variables.
